# Supplementary material
Source: PubMed Central journal article supplement (PMC4665995)
Supplement: NIHMS738310-supplement-Appendix.pdf [file NIHMS738310-supplement-Appendix.pdf]

## Supplementary Online Content

Jena AB, Khullar D, Ho O, Olenski AR, Blumenthal DM. Sex Differences in Academic Rank in US Medical Schools in 2014. *JAMA*. doi:10.1001/jama.2015.10680

**eTable 1.** Characteristics of physicians with missing data on years since residency

**eTable 2.** Multivariable analysis of factors associated with faculty rank in 2014, among physicians self-registered with Doximity

**eTable 3.** Multivariable analysis of factors associated with faculty rank in 2014, among physicians not self-registered with Doximity

**eTable 4.** Multivariable analysis of factors associated with faculty rank in 2014, among physicians with a history of NIH funding

This supplementary material has been provided by the authors to give readers additional information about their work.

**eTable 1.** Characteristics of physicians with missing data on years since residency

|                                                            | Non-missing data on years since residency<br>(N = 84,404) | Missing data on years since residency<br>(N = 6,669) |
|------------------------------------------------------------|-----------------------------------------------------------|------------------------------------------------------|
| <b>Faculty rank, No. (%)</b>                               |                                                           |                                                      |
| Assistant Professor                                        | 46,635 (55.3%)                                            | 3,648 (54.7%)                                        |
| Associate Professor                                        | 18,607 (22.1%)                                            | 1,474 (22.1%)                                        |
| Full Professor                                             | 19,162 (22.6%)                                            | 1,547 (23.2%)                                        |
| <b>Age, mean years (sd)</b>                                | 50.5 (11.4)                                               | 50.5 (12.2)                                          |
| <b>Specialty, No. (%)</b>                                  |                                                           |                                                      |
| Anesthesiology                                             | 5,131 (6.1)                                               | 526 (7.9)                                            |
| Cardiology                                                 | 3,717 (4.4)                                               | 279 (4.2)                                            |
| Emergency Medicine                                         | 3,285 (3.9)                                               | 223 (3.3)                                            |
| Family Medicine                                            | 3,473 (4.1)                                               | 322 (4.8)                                            |
| Gastroenterology                                           | 1,829 (2.2)                                               | 158 (2.4)                                            |
| Hematology and Oncology                                    | 2,909 (3.4)                                               | 239 (3.6)                                            |
| Infectious Disease                                         | 1,871 (2.2)                                               | 105 (1.6)                                            |
| Internal Medicine                                          | 8,324 (9.9)                                               | 578 (8.7)                                            |
| Neurology                                                  | 3,676 (4.4)                                               | 204 (3.1)                                            |
| Obstetrics and Gynecology                                  | 3,670 (4.3)                                               | 152 (2.3)                                            |
| Orthopedic Surgery                                         | 2,297 (2.7)                                               | 180 (2.7)                                            |
| Other                                                      | 10,600 (12.6)                                             | 1,074 (16.1)                                         |
| Pathology                                                  | 3,204 (3.8)                                               | 275 (4.1)                                            |
| Pediatrics                                                 | 11,680 (13.8)                                             | 716 (10.7)                                           |
| Psychiatry                                                 | 4,528 (5.4)                                               | 261 (3.9)                                            |
| Radiology                                                  | 4,393 (5.2)                                               | 610 (9.1)                                            |
| Surgery, general                                           | 4,129 (4.9)                                               | 326 (4.9)                                            |
| Surgery, subspecialty                                      | 5,688 (6.7)                                               | 441 (6.6)                                            |
| <b>Publications (total), mean no. (sd)</b>                 | 20.1 (30.6)                                               | 22.2 (32.3)                                          |
| <b>NIH grant (at least one), No. (%)</b>                   | 7,675 (9.1)                                               | 621 (9.3)                                            |
| <b>Clinical trial investigator (at least one), No. (%)</b> | 6,804 (8.1)                                               | 506 (7.6)                                            |
| <b>Faculty member at top-20 school, No. (%)</b>            | 24,060 (28.5)                                             | (2006) 30.1                                          |

**Notes:** Data was missing on only one variable, years since residency, in 6,669/91,073 physicians (7.0%). These physicians were excluded from multivariable analysis since the characteristics of these physicians were comparable to physicians for whom years since residency was not missing (see table above). “Top-20” school refers to whether a physician was on faculty at a medical school ranked among the top 20 U.S. medical schools for research by U.S. News and World Report in 2013.

**eTable 2.** Multivariable analysis of factors associated with faculty rank in 2014, among physicians self-registered with Doximity

|                | <b>Full professor</b><br>Crude proportion (%) | Absolute difference in proportion Unadjusted Adjusted (95% CI) | <b>Associate or Full professor</b><br>Crude proportion (%) | Absolute difference in proportion Unadjusted Adjusted (95% CI) | <b>Full professor</b><br>Crude proportion (%) | Absolute difference in proportion Unadjusted Adjusted (95% CI) |
|----------------|-----------------------------------------------|----------------------------------------------------------------|------------------------------------------------------------|----------------------------------------------------------------|-----------------------------------------------|----------------------------------------------------------------|
| <b>Sample</b>  | All faculty (34,745)                          |                                                                | All faculty (34,745)                                       |                                                                | Associate or full (16,812)                    |                                                                |
| <b>Sex</b>     |                                               |                                                                |                                                            |                                                                |                                               |                                                                |
| Male           | 7,295 / 24,004<br>(30.4%)                     | Reference                                                      | 12,988 / 24,004<br>(54.1%)                                 | Reference                                                      | 7,295 / 12,988<br>(56.2%)                     | Reference                                                      |
| Female         | 1,486 / 10,741<br>(13.8%)                     | -16.6%<br>-3.5% (-4.4,-2.6)                                    | 3,824 / 10,741<br>(35.6%)                                  | -18.5%<br>-2.4% (-3.3,-1.5)                                    | 1,486 / 3,824<br>(38.9%)                      | -17.3%<br>-5.4% (-7,-3.7)                                      |
| <b>Age</b>     |                                               |                                                                |                                                            |                                                                |                                               |                                                                |
| < 40 years     | 30 / 6,622<br>(0.5%)                          | Reference                                                      | 223 / 6,622<br>(3.4%)                                      | Reference                                                      | 30 / 223<br>(13.5%)                           | Reference                                                      |
| 40-44 years    | 82 / 5,806<br>(1.4%)                          | 0.9%<br>1.2% (-0.9,3.4)                                        | 1,232 / 5,806<br>(21.2%)                                   | 17.8%<br>19.3% (17.3,21.4)                                     | 82 / 1,232<br>(6.7%)                          | -6.8%<br>-19.3% (-28.8,-9.8)                                   |
| 45-49 years    | 580 / 5,059<br>(11.5%)                        | 11.0%<br>14.2% (12.1,16.4)                                     | 2,489 / 5,059<br>(49.2%)                                   | 45.8%<br>32.2% (29.8,34.5)                                     | 580 / 2,489<br>(23.3%)                        | 9.8%<br>1.1% (-8.1,10.2)                                       |
| 50-54 years    | 1,434 / 4,917<br>(29.2%)                      | 28.7%<br>22.8% (20.5,25.1)                                     | 3,236 / 4,917<br>(65.8%)                                   | 62.4%<br>34.3% (31.6,37)                                       | 1,434 / 3,236<br>(44.3%)                      | 30.8%<br>13.7% (4.5,23)                                        |
| 55-59 years    | 1,982 / 4,680<br>(42.4%)                      | 41.9%<br>23.8% (21.3,26.3)                                     | 3,416 / 4,680<br>(73.0%)                                   | 69.6%<br>30.7% (27.7,33.7)                                     | 1,982 / 3,416<br>(58.0%)                      | 44.5%<br>15.9% (6.4,25.4)                                      |
| 60-64 years    | 2,048 / 3,661<br>(55.9%)                      | 55.4%<br>23.6% (20.8,26.3)                                     | 2,900 / 3,661<br>(79.2%)                                   | 75.8%<br>25.6% (22.3,29)                                       | 2,048 / 2,900<br>(70.6%)                      | 57.1%<br>17.6% (7.8,27.4)                                      |
| Above 65 years | 2,625 / 4,000<br>(65.6%)                      | 65.1%<br>18.3%                                                 | 3,316 / 4,000<br>(82.9%)                                   | 79.5%<br>17.0%                                                 | 2,625 / 3,316<br>(79.2%)                      | 65.7%<br>11.7%                                                 |

|                                                     |                  |                       |                  |                       |                  |                      |
|-----------------------------------------------------|------------------|-----------------------|------------------|-----------------------|------------------|----------------------|
|                                                     |                  | (15.4,21.2)           |                  | (13.4,20.5)           |                  | (1.4,21.9)           |
| <b>Years since residency (ref. increment, 1 yr)</b> |                  | 1.2%<br>(1.2,1.3)     |                  | 1.6%<br>(1.6,1.7)     |                  | 1.8% (1.6,1.9)       |
| <b>Specialty</b>                                    |                  |                       |                  |                       |                  |                      |
| Anesthesiology                                      | 359 /<br>1,817   | Reference             | 786 /<br>1,817   | Reference             | 359 / 786        | Reference            |
|                                                     | (19.8%)          |                       | (43.3%)          |                       | (45.7%)          |                      |
| Cardiology                                          | 542 /<br>1,856   | 9.4%                  | 967 /<br>1,856   | 8.8%                  | 542 / 967        | 10.3%                |
|                                                     | (29.2%)          | -1.5% (-<br>3.6,0.6)  | (52.1%)          | -3.0% (-<br>5.4,-0.6) | (56.0%)          | -3.5% (-<br>7.5,0.5) |
| Emergency Medicine                                  | 150 /<br>1,217   | -7.5%                 | 405 /<br>1,217   | -10.0%                | 150 / 405        | -8.7%                |
|                                                     | (12.3%)          | -0.2% (-<br>3,2.6)    | (33.3%)          | 1.2% (-<br>1.5,3.9)   | (37.0%)          | 0.7% (-4.6,6)        |
| Family Medicine                                     | 187 /<br>1,184   | -4.0%                 | 472 /<br>1,184   | -3.4%                 | 187 / 472        | -6.1%                |
|                                                     | (15.8%)          | -2.7% (-5.2,-<br>0.2) | (39.9%)          | -2.5% (-<br>5.2,0.1)  | (39.6%)          | -4.2% (-<br>9.1,0.8) |
| Gastroenterology                                    | 246 / 826        | 10.0%                 | 440 / 826        | 10.0%                 | 246 / 440        | 10.2%                |
|                                                     | (29.8%)          | 0.8% (-2,3.6)         | (53.3%)          | 2.6% (-<br>0.5,5.7)   | (55.9%)          | -1.9% (-<br>6.9,3.1) |
| Hematology/Oncology                                 | 415 /<br>1,267   | 13.0%                 | 714 /<br>1,267   | 13.1%                 | 415 / 714        | 12.4%                |
|                                                     | (32.8%)          | -0.4% (-<br>2.8,2)    | (56.4%)          | -1.4% (-<br>4.2,1.4)  | (58.1%)          | -2.9% (-<br>7.3,1.5) |
| Infectious Disease                                  | 228 / 666        | 14.4%                 | 392 / 666        | 15.6%                 | 228 / 392        | 12.5%                |
|                                                     | (34.2%)          | 2.3% (-<br>0.6,5.2)   | (58.9%)          | 2.3% (-<br>1,5.6)     | (58.2%)          | -0.7% (-<br>5.9,4.4) |
| Internal Medicine                                   | 548 /<br>3,215   | -2.8%                 | 1,225 /<br>3,215 | -5.2%                 | 548 /<br>1,225   | -1.0%                |
|                                                     | (17.0%)          | -1.8% (-<br>3.8,0.2)  | (38.1%)          | -1.3% (-<br>3.4,0.8)  | (44.7%)          | -1.9% (-<br>5.8,1.9) |
| Neurology                                           | 501 /<br>1,635   | 10.8%                 | 866 /<br>1,635   | 9.7%                  | 501 / 866        | 12.2%                |
|                                                     | (30.6%)          | 2.5%<br>(0.2,4.7)     | (53.0%)          | 1.6% (-<br>0.9,4)     | (57.9%)          | 0.9% (-3.2,5)        |
| Obstetrics and Gynecology                           | 331 /<br>1,558   | 1.4%                  | 708 /<br>1,558   | 2.1%                  | 331 / 708        | 1.1%                 |
|                                                     | (21.2%)          | -0.6% (-<br>2.9,1.7)  | (45.4%)          | 0.0% (-<br>2.5,2.4)   | (46.8%)          | -2.7% (-7,1.7)       |
| Orthopedic Surgery                                  | 251 /<br>1,018   | 4.9%                  | 493 /<br>1,018   | 5.1%                  | 251 / 493        | 5.2%                 |
|                                                     | (24.7%)          | 0.2% (-<br>2.4,2.7)   | (48.4%)          | -0.4% (-<br>3.2,2.5)  | (50.9%)          | -1.4% (-<br>6.2,3.3) |
| Other                                               | 1,413 /<br>4,673 | 10.4%                 | 2,480 /<br>4,673 | 9.8%                  | 1,413 /<br>2,480 | 11.3%                |
|                                                     | (30.2%)          | 1.7% (-               | (53.1%)          | 0.9% (-               | (57.0%)          | 0.6% (-2.8,4)        |

© 2015 American Medical Association. All rights reserved.

|                                                                    |                   |                      |                    |                      |                   |                      |
|--------------------------------------------------------------------|-------------------|----------------------|--------------------|----------------------|-------------------|----------------------|
|                                                                    |                   | 0.2,3.5)             |                    | 1.1,2.9)             |                   |                      |
| Pathology                                                          | 381 /<br>1,081    | 15.4%                | 646 /<br>1,081     | 16.5%                | 381 / 646         | 13.3%                |
|                                                                    | (35.2%)           | 6.2%<br>(3.6,8.7)    | (59.8%)            | 6.6%<br>(3.9,9.3)    | (59.0%)           | 6.6%<br>(2.2,10.9)   |
| Pediatrics                                                         | 1,036 /<br>4,778  | 1.9%                 | 2,131 /<br>4,778   | 1.3%                 | 1,036 /<br>2,131  | 2.9%                 |
|                                                                    | (21.7%)           | 0.0% (-<br>1.8,1.9)  | (44.6%)            | 0.9% (-<br>1,2.9)    | (48.6%)           | -2.9% (-<br>6.3,0.5) |
| Psychiatry                                                         | 362 /<br>1,423    | 5.6%                 | 666 /<br>1,423     | 3.5%                 | 362 / 666         | 8.7%                 |
|                                                                    | (25.4%)           | -1.9% (-<br>4.2,0.4) | (46.8%)            | -2.1% (-<br>4.6,0.4) | (54.4%)           | -3.5% (-<br>7.8,0.9) |
| Radiology                                                          | 422 /<br>1,700    | 5.0%                 | 790 /<br>1,700     | 3.2%                 | 422 / 790         | 7.7%                 |
|                                                                    | (24.8%)           | 1.0% (-<br>1.2,3.2)  | (46.5%)            | -1.1% (-<br>3.5,1.4) | (53.4%)           | 1.2% (-<br>2.9,5.4)  |
| Surgery, general                                                   | 513 /<br>1,791    | 8.8%                 | 978 /<br>1,791     | 11.3%                | 513 / 978         | 6.8%                 |
|                                                                    | (28.6%)           | 5.0%<br>(2.7,7.2)    | (54.6%)            | 4.6%<br>(2.2,6.9)    | (52.5%)           | 5.2%<br>(1.3,9.2)    |
| Surgery, subspecialty                                              | 896 /<br>3,040    | 9.7%                 | 1,653 /<br>3,040   | 11.1%                | 896 /<br>1,653    | 8.5%                 |
|                                                                    | (29.5%)           | 3.1%<br>(1.1,5.1)    | (54.4%)            | 2.8% (0.7,5)         | (54.2%)           | 2.8% (-<br>0.8,6.4)  |
| <b>Publications, total (ref. increment, 1 pub.)</b>                |                   | 0.2%<br>(0.1,0.2)    |                    | 0.3%<br>(0.3,0.3)    |                   | 0.2% (0.1,0.2)       |
| <b>Publications, first or last author (ref. increment, 1 pub.)</b> |                   | 0.1%<br>(0.1,0.2)    |                    | 0.2%<br>(0.1,0.3)    |                   | 0.2% (0.1,0.3)       |
| <b>NIH grant</b>                                                   |                   |                      |                    |                      |                   |                      |
| No                                                                 | 6,634 /<br>31,137 | Reference            | 13,803 /<br>31,137 | Reference            | 6,634 /<br>13,803 | Reference            |
|                                                                    | (21.3%)           |                      | (44.3%)            |                      | (48.1%)           |                      |
| Yes                                                                | 2,147 /<br>3,608  | 38.2%                | 3,009 /<br>3,608   | 39.1%                | 2,147 /<br>3,009  | 23.3%                |
|                                                                    | (59.5%)           | 4.5%<br>(3.2,5.7)    | (83.4%)            | 3.9%<br>(2.2,5.5)    | (71.4%)           | 5.4%<br>(3.4,7.5)    |
| <b>Clinical trial investigator</b>                                 |                   |                      |                    |                      |                   |                      |
| No                                                                 | 7,175 /<br>31,295 | Reference            | 14,264 /<br>31,295 | Reference            | 7,175 /<br>14,264 | Reference            |
|                                                                    | (22.9%)           |                      | (45.6%)            |                      | (50.3%)           |                      |
| Yes                                                                | 1,606 /<br>3,450  | 23.7%                | 2,548 /<br>3,450   | 28.3%                | 1,606 /<br>2,548  | 12.7%                |
|                                                                    | (46.6%)           | 6.1%<br>(4.8,7.3)    | (73.9%)            | 7.8%<br>(6.4,9.3)    | (63.0%)           | 6.8%<br>(4.8,8.8)    |
| <b>Faculty at top-20 medical school</b>                            |                   |                      |                    |                      |                   |                      |

© 2015 American Medical Association. All rights reserved.

|     |                   |                     |                    |                      |                   |                     |
|-----|-------------------|---------------------|--------------------|----------------------|-------------------|---------------------|
| No  | 5,759 /<br>23,975 | Reference           | 11,228 /<br>23,975 | Reference            | 5,759 /<br>11,228 | Reference           |
|     | (24.0%)           |                     | (46.8%)            |                      | (51.3%)           |                     |
| Yes | 3,022 /<br>10,770 | 4.1%                | 5,584 /<br>10,770  | 5.0%                 | 3,022 /<br>5,584  | 2.8%                |
|     | (28.1%)           | 1.5% (-<br>1.8,4.9) | (51.8%)            | -0.5% (-<br>4.6,3.7) | (54.1%)           | 1.3% (-<br>3.1,5.6) |

**Notes:** eTables 2 and 3 address potential inaccuracies in the database by analyzing sex differences in faculty rank among physicians who self-completed profiles with Doximity (N = 34,745), a sub-group for whom these data are presumably most accurate (eTable2) as well as non-registered physicians (eTable3). In both tables, Column (1) reports factors associated with full professorship among faculty of all ranks. Column (2) reports factors associated with associate or full professorship among faculty of all ranks. Column (3) reports factors associated with full professorship among faculty at the associate or full professor rank. The reported association between faculty rank and publication count (or years since residency) reflects the marginal impact of an additional publication (or year post residency) on the probability of a given faculty rank. “Top-20” school refers to whether a physician was on faculty at a medical school ranked among the top 20 U.S. medical schools for research by U.S. News and World Report in 2013.

**eTable 3.** Multivariable analysis of factors associated with faculty rank in 2014, among physicians not self-registered with Doximity

|                | <b>Full professor</b><br>Crude proportion (%) | Absolute difference in proportion Unadjusted Adjusted (95% CI) | <b>Associate or Full professor</b><br>Crude proportion (%) | Absolute difference in proportion Unadjusted Adjusted (95% CI) | <b>Full professor</b><br>Crude proportion (%) | Absolute difference in proportion Unadjusted Adjusted (95% CI) |
|----------------|-----------------------------------------------|----------------------------------------------------------------|------------------------------------------------------------|----------------------------------------------------------------|-----------------------------------------------|----------------------------------------------------------------|
| <b>Sample</b>  | All faculty (56,328)                          |                                                                | All faculty (56,328)                                       |                                                                | Associate or full (24,242)                    |                                                                |
| <b>Sex</b>     |                                               |                                                                |                                                            |                                                                |                                               |                                                                |
| Male           | 10,059 / 36,605<br>(27.5%)                    | Reference                                                      | 18,365 / 36,605<br>(50.2%)                                 | Reference                                                      | 10,059 / 18,365<br>(54.8%)                    | Reference                                                      |
| Female         | 2,137 / 19,723<br>(10.8%)                     | -16.7%<br>-4.0% (-4.7,-3.4)                                    | 5,877 / 19,723<br>(29.8%)                                  | -20.4%<br>-3.1% (-3.8,-2.4)                                    | 2,137 / 5,877<br>(36.4%)                      | -18.4%<br>-6.7% (-8.1,-5.4)                                    |
| <b>Age</b>     |                                               |                                                                |                                                            |                                                                |                                               |                                                                |
| < 40 years     | 112 / 10,913<br>(1.0%)                        | Reference                                                      | 388 / 10,913<br>(3.6%)                                     | Reference                                                      | 112 / 388<br>(28.9%)                          | Reference                                                      |
| 40-44 years    | 125 / 8,412<br>(1.5%)                         | 0.5%<br>-2.3% (-3.8,-0.8)                                      | 1,618 / 8,412<br>(19.2%)                                   | 15.6%<br>17.0% (15.4,18.5)                                     | 125 / 1,618<br>(7.7%)                         | -21.2%<br>-41.3% (-46.9,-35.6)                                 |
| 45-49 years    | 600 / 7,310<br>(8.2%)                         | 7.2%<br>6.2% (4.7,7.8)                                         | 2,939 / 7,310<br>(40.2%)                                   | 36.6%<br>29.5% (27.7,31.2)                                     | 600 / 2,939<br>(20.4%)                        | -8.5%<br>-27.7% (-33,-22.4)                                    |
| 50-54 years    | 1,608 / 6,995<br>(23.0%)                      | 22.0%<br>15.3% (13.7,17)                                       | 3,995 / 6,995<br>(57.1%)                                   | 53.5%<br>34.5% (32.6,36.5)                                     | 1,608 / 3,995<br>(40.3%)                      | 11.4%<br>-13.3% (-18.5,-8)                                     |
| 55-59 years    | 2,401 / 6,721<br>(35.7%)                      | 34.7%<br>17.4% (15.7,19.2)                                     | 4,379 / 6,721<br>(65.2%)                                   | 61.6%<br>32.7% (30.6,34.8)                                     | 2,401 / 4,379<br>(54.8%)                      | 25.9%<br>-9.4% (-14.8,-4)                                      |
| 60-64 years    | 2,448 / 5,479<br>(44.7%)                      | 43.7%<br>17.0% (15.1,18.9)                                     | 3,853 / 5,479<br>(70.3%)                                   | 66.7%<br>29.0% (26.7,31.3)                                     | 2,448 / 3,853<br>(63.5%)                      | 34.6%<br>-8.6% (-14.2,-3)                                      |
| Above 65 years | 4,902 / 10,498<br>(46.7%)                     | 45.7%<br>13.2% (11.3,15.1)                                     | 7,070 / 10,498<br>(67.3%)                                  | 63.7%<br>23.5% (21.2,25.7)                                     | 4,902 / 7,070<br>(69.3%)                      | 40.4%<br>-13.0% (-18.9,-7.2)                                   |

| Years since residency (ref. increment, 1 yr) | 1.0%          | (1,1.1)          | 1.3%          | (1.3,1.4)         | 1.6%          | (1.5,1.7)       |
|----------------------------------------------|---------------|------------------|---------------|-------------------|---------------|-----------------|
| Specialty                                    |               |                  |               |                   |               |                 |
| Anesthesiology                               | 515 / 3,840   | Reference        | 1,281 / 3,840 | Reference         | 515 / 1,281   | Reference       |
|                                              | (13.4%)       |                  | (33.4%)       |                   | (40.2%)       |                 |
| Cardiology                                   | 617 / 2,140   | 15.4%            | 1,095 / 2,140 | 17.8%             | 617 / 1,095   | 16.1%           |
|                                              | (28.8%)       | 0.4% (-1.3,2.1)  | (51.2%)       | -1.7% (-3.8,0.3)  | (56.3%)       | 0.2% (-3.4,3.8) |
| Emergency Medicine                           | 236 / 2,291   | -3.1%            | 637 / 2,291   | -5.6%             | 236 / 637     | -3.2%           |
|                                              | (10.3%)       | 0.0% (-2,1.9)    | (27.8%)       | -0.1% (-2.2,2)    | (37.0%)       | 2.0% (-2.3,6.2) |
| Family Medicine                              | 348 / 2,611   | -0.1%            | 822 / 2,611   | -1.9%             | 348 / 822     | 2.1%            |
|                                              | (13.3%)       | -0.5% (-2.3,1.3) | (31.5%)       | -2.6% (-4.5,-0.6) | (42.3%)       | 2.4% (-1.5,6.3) |
| Gastroenterology                             | 317 / 1,161   | 13.9%            | 560 / 1,161   | 14.8%             | 317 / 560     | 16.4%           |
|                                              | (27.3%)       | 0.9% (-1.2,3.1)  | (48.2%)       | -1.5% (-4.1,1.1)  | (56.6%)       | 2.2% (-2.4,6.7) |
| Hematology/Oncology                          | 592 / 1,881   | 18.1%            | 1,016 / 1,881 | 20.6%             | 592 / 1,016   | 18.1%           |
|                                              | (31.5%)       | 1.2% (-0.6,3)    | (54.0%)       | -2.5% (-4.7,-0.3) | (58.3%)       | 1.6% (-2.1,5.3) |
| Infectious Disease                           | 391 / 1,310   | 16.4%            | 733 / 1,310   | 22.6%             | 391 / 733     | 13.1%           |
|                                              | (29.8%)       | 3.4% (1.3,5.5)   | (56.0%)       | 5.1% (2.7,7.5)    | (53.3%)       | 2.0% (-2,6)     |
| Internal Medicine                            | 886 / 5,687   | 2.2%             | 2,014 / 5,687 | 2.0%              | 886 / 2,014   | 3.8%            |
|                                              | (15.6%)       | 0.1% (-1.3,1.6)  | (35.4%)       | 0.0% (-1.6,1.7)   | (44.0%)       | 0.6% (-2.6,3.7) |
| Neurology                                    | 606 / 2,245   | 13.6%            | 1,090 / 2,245 | 15.2%             | 606 / 1,090   | 15.4%           |
|                                              | (27.0%)       | 3.5% (1.7,5.3)   | (48.6%)       | 3.0% (1,5.1)      | (55.6%)       | 3.4% (-0.2,7)   |
| Obstetrics and Gynecology                    | 436 / 2,264   | 5.9%             | 926 / 2,264   | 7.5%              | 436 / 926     | 6.9%            |
|                                              | (19.3%)       | 2.4% (0.6,4.2)   | (40.9%)       | 2.5% (0.5,4.5)    | (47.1%)       | 3.0% (-0.7,6.6) |
| Orthopedic Surgery                           | 346 / 1,459   | 10.3%            | 728 / 1,459   | 16.5%             | 346 / 728     | 7.3%            |
|                                              | (23.7%)       | 1.2% (-0.8,3.1)  | (49.9%)       | 2.7% (0.4,5)      | (47.5%)       | 0.5% (-3.5,4.5) |
| Other                                        | 1,870 / 7,001 | 13.3%            | 3,433 / 7,001 | 15.6%             | 1,870 / 3,433 | 14.3%           |
|                                              | (26.7%)       | 2.4% (1,3.7)     | (49.0%)       | 2.8%              | (54.5%)       | 2.5% (-         |

© 2015 American Medical Association. All rights reserved.



|                                                                    |                    |                      |                    |                     |                    |                      |
|--------------------------------------------------------------------|--------------------|----------------------|--------------------|---------------------|--------------------|----------------------|
|                                                                    |                    |                      |                    | (1.2,4.4)           |                    | 0.4,5.4)             |
| Pathology                                                          | 707 /<br>2,398     | 16.1%                | 1,328 /<br>2,398   | 22.0%               | 707 /<br>1,328     | 13.0%                |
|                                                                    | (29.5%)            | 7.1%<br>(5.3,8.9)    | (55.4%)            | 8.5%<br>(6.6,10.5)  | (53.2%)            | 8.0%<br>(4.6,11.4)   |
| Pediatrics                                                         | 1,359 /<br>7,618   | 4.4%                 | 2,955 /<br>7,618   | 5.4%                | 1,359 /<br>2,955   | 5.8%                 |
|                                                                    | (17.8%)            | 2.0%<br>(0.6,3.4)    | (38.8%)            | 1.8%<br>(0.2,3.3)   | (46.0%)            | 1.4% (-<br>1.5,4.3)  |
| Psychiatry                                                         | 656 /<br>3,366     | 6.1%                 | 1,317 /<br>3,366   | 5.7%                | 656 /<br>1,317     | 9.6%                 |
|                                                                    | (19.5%)            | -1.3% (-<br>2.8,0.3) | (39.1%)            | -2.2% (-4,-<br>0.4) | (49.8%)            | -1.8% (-<br>5.2,1.6) |
| Radiology                                                          | 726 /<br>3,303     | 8.6%                 | 1,365 /<br>3,303   | 7.9%                | 726 /<br>1,365     | 13.0%                |
|                                                                    | (22.0%)            | 3.3%<br>(1.6,4.9)    | (41.3%)            | 0.8% (-<br>1.1,2.6) | (53.2%)            | 6.2%<br>(2.8,9.6)    |
| Surgery, general                                                   | 719 /<br>2,664     | 13.6%                | 1,316 /<br>2,664   | 16.0%               | 719 /<br>1,316     | 14.4%                |
|                                                                    | (27.0%)            | 5.4%<br>(3.7,7.2)    | (49.4%)            | 3.7%<br>(1.8,5.7)   | (54.6%)            | 7.3%<br>(3.9,10.7)   |
| Surgery, subspecialty                                              | 869 /<br>3,089     | 14.7%                | 1,626 /<br>3,089   | 19.2%               | 869 /<br>1,626     | 13.2%                |
|                                                                    | (28.1%)            | 3.4% (1.8,5)         | (52.6%)            | 2.8%<br>(0.9,4.7)   | (53.4%)            | 4.0%<br>(0.7,7.3)    |
| <b>Publications, total (ref. increment, 1 pub.)</b>                |                    | 0.2%<br>(0.2,0.2)    |                    | 0.5%<br>(0.5,0.5)   |                    | 0.3% (0.3,0.3)       |
| <b>Publications, first or last author (ref. increment, 1 pub.)</b> |                    | 0.2%<br>(0.2,0.2)    |                    | 0.5%<br>(0.5,0.5)   |                    | 0.3% (0.3,0.3)       |
| <b>NIH grant</b>                                                   |                    |                      |                    |                     |                    |                      |
| No                                                                 | 9,508 /<br>51,640  | Reference            | 20,354 /<br>51,640 | Reference           | 9,508 /<br>20,354  | Reference            |
|                                                                    | (18.4%)            |                      | (39.4%)            |                     | (46.7%)            |                      |
| Yes                                                                | 2,688 /<br>4,688   | 38.9%                | 3,888 /<br>4,688   | 43.5%               | 2,688 /<br>3,888   | 22.4%                |
|                                                                    | (57.3%)            | 3.0%<br>(1.9,4.1)    | (82.9%)            | 2.9%<br>(1.3,4.5)   | (69.1%)            | 3.8%<br>(1.8,5.7)    |
| <b>Clinical trial investigator</b>                                 |                    |                      |                    |                     |                    |                      |
| No                                                                 | 10,411 /<br>52,468 | Reference            | 21,357 /<br>52,468 | Reference           | 10,411 /<br>21,357 | Reference            |
|                                                                    | (19.8%)            |                      | (40.7%)            |                     | (48.7%)            |                      |
| Yes                                                                | 1,785 /<br>3,860   | 26.4%                | 2,885 /<br>3,860   | 34.0%               | 1,785 /<br>2,885   | 13.2%                |
|                                                                    | (46.2%)            | 5.7%<br>(4.5,6.9)    | (74.7%)            | 8.6%<br>(7.2,10.1)  | (61.9%)            | 6.0%<br>(4.1,7.9)    |
| <b>Faculty at top-20 medical school</b>                            |                    |                      |                    |                     |                    |                      |

© 2015 American Medical Association. All rights reserved.

|     |                   |                     |                    |                      |                   |                     |
|-----|-------------------|---------------------|--------------------|----------------------|-------------------|---------------------|
| No  | 8,120 /<br>41,032 | Reference           | 16,627 /<br>41,032 | Reference            | 8,120 /<br>16,627 | Reference           |
|     | (19.8%)           |                     | (40.5%)            |                      | (48.8%)           |                     |
| Yes | 4,076 /<br>15,296 | 6.8%                | 7,615 /<br>15,296  | 9.3%                 | 4,076 /<br>7,615  | 4.7%                |
|     | (26.6%)           | 1.3% (-<br>1.7,4.3) | (49.8%)            | -0.1% (-<br>4.6,4.3) | (53.5%)           | 1.5% (-<br>2.3,5.3) |

**Notes:** eTables 2 and 3 address potential inaccuracies in the database by analyzing sex differences in faculty rank among physicians who self-completed profiles with Doximity (N = 34,745), a sub-group for whom these data are presumably most accurate (eTable2) as well as non-registered physicians (eTable3). In both tables, Column (1) reports factors associated with full professorship among faculty of all ranks. Column (2) reports factors associated with associate or full professorship among faculty of all ranks. Column (3) reports factors associated with full professorship among faculty at the associate or full professor rank. The reported association between faculty rank and publication count (or years since residency) reflects the marginal impact of an additional publication (or year post residency) on the probability of a given faculty rank. . “Top-20” school refers to whether a physician was on faculty at a medical school ranked among the top 20 U.S. medical schools for research by U.S. News and World Report in 2013.

**eTable 4.** Multivariable analysis of factors associated with faculty rank in 2014, among physicians with a history of NIH funding

|                | <b>Full professor</b><br>Crude proportion (%) | Absolute difference in proportion Unadjusted Adjusted (95% CI) | <b>Associate or Full professor</b><br>Crude proportion (%) | Absolute difference in proportion Unadjusted Adjusted (95% CI) | <b>Full professor</b><br>Crude proportion (%) | Absolute difference in proportion Unadjusted Adjusted (95% CI) |
|----------------|-----------------------------------------------|----------------------------------------------------------------|------------------------------------------------------------|----------------------------------------------------------------|-----------------------------------------------|----------------------------------------------------------------|
| <b>Sample</b>  | All faculty (13,225)                          |                                                                | All faculty (13,225)                                       |                                                                | Associate or full (10,197)                    |                                                                |
| <b>Sex</b>     |                                               |                                                                |                                                            |                                                                |                                               |                                                                |
| Male           | 5,457 / 9,790<br>(55.7%)                      | Reference                                                      | 7,922 / 9,790<br>(80.9%)                                   | Reference                                                      | 5,457 / 7,922<br>(68.9%)                      | Reference                                                      |
| Female         | 1,197 / 3,435<br>(34.8%)                      | -20.9%<br>-2.8% (-4.3,-1.4)                                    | 2,275 / 3,435<br>(66.2%)                                   | -14.7%<br>-1.0% (-2.2,0.1)                                     | 1,197 / 2,275<br>(52.6%)                      | -16.3%<br>-3.5% (-5.3,-1.7)                                    |
| <b>Age</b>     |                                               |                                                                |                                                            |                                                                |                                               |                                                                |
| < 40 years     | 12 / 760<br>(1.6%)                            | Reference                                                      | 57 / 760<br>(7.5%)                                         | Reference                                                      | 12 / 57<br>(21.1%)                            | Reference                                                      |
| 40-44 years    | 60 / 1,785<br>(3.4%)                          | 1.8%<br>1.7% (-6.4,9.8)                                        | 642 / 1,785<br>(36.0%)                                     | 28.5%<br>18.5% (14.1,23)                                       | 60 / 642<br>(9.3%)                            | -11.8%<br>-17.8% (-32,-3.5)                                    |
| 45-49 years    | 423 / 2,079<br>(20.3%)                        | 18.7%<br>18.9% (11.1,26.6)                                     | 1,462 / 2,079<br>(70.3%)                                   | 62.8%<br>27.8% (23,32.6)                                       | 423 / 1,462<br>(28.9%)                        | 7.8%<br>-0.9% (-14.6,12.8)                                     |
| 50-54 years    | 1,145 / 2,291<br>(50.0%)                      | 48.4%<br>29.5% (21.6,37.4)                                     | 2,026 / 2,291<br>(88.4%)                                   | 80.9%<br>31.8% (26.6,36.9)                                     | 1,145 / 2,026<br>(56.5%)                      | 35.4%<br>10.5% (-3.3,24.3)                                     |
| 55-59 years    | 1,534 / 2,152<br>(71.3%)                      | 69.7%<br>30.9% (22.7,39.1)                                     | 2,039 / 2,152<br>(94.7%)                                   | 87.2%<br>31.9% (26.2,37.5)                                     | 1,534 / 2,039<br>(75.2%)                      | 54.1%<br>11.9% (-2.1,25.8)                                     |
| 60-64 years    | 1,479 / 1,770<br>(83.6%)                      | 82.0%<br>30.5% (21.9,39)                                       | 1,708 / 1,770<br>(96.5%)                                   | 89.0%<br>25.9% (19.4,32.5)                                     | 1,479 / 1,708<br>(86.6%)                      | 65.5%<br>12.9% (-1.4,27.2)                                     |
| Above 65 years | 2,001 / 2,388<br>(83.8%)                      | 82.2%<br>24.2% (15.5,32.9)                                     | 2,263 / 2,388<br>(94.8%)                                   | 87.3%<br>22.5% (16.4,28.6)                                     | 2,001 / 2,263<br>(88.4%)                      | 67.3%<br>7.6% (-6.8,22.1)                                      |

| Years since residency (ref. increment, 1 yr) |               | 1.8%<br>(1.7,1.9) |               | 1.4%<br>(1.3,1.5) |               | 2.0% (1.8,2.2)    |
|----------------------------------------------|---------------|-------------------|---------------|-------------------|---------------|-------------------|
| Specialty                                    |               |                   |               |                   |               |                   |
| Anesthesiology                               | 129 / 331     | Reference         | 234 / 331     | Reference         | 129 / 234     | Reference         |
|                                              | (39.0%)       |                   | (70.7%)       |                   | (55.1%)       |                   |
| Cardiology                                   | 402 / 746     | 14.9%             | 592 / 746     | 8.7%              | 402 / 592     | 12.8%             |
|                                              | (53.9%)       | 0.6% (-4,5.2)     | (79.4%)       | -3.0% (-6.8,0.7)  | (67.9%)       | -2.2% (-7.9,3.4)  |
| Emergency Medicine                           | 72 / 178      | 1.4%              | 127 / 178     | 0.6%              | 72 / 127      | 1.6%              |
|                                              | (40.4%)       | 8.3% (1.9,14.6)   | (71.3%)       | 4.4% (-0.1,8.9)   | (56.7%)       | 7.0% (-0.5,14.5)  |
| Family Medicine                              | 60 / 133      | 6.1%              | 99 / 133      | 3.7%              | 60 / 99       | 5.5%              |
|                                              | (45.1%)       | -3.6% (-10.8,3.6) | (74.4%)       | -3.5% (-9.4,2.4)  | (60.6%)       | -5.1% (-14.4,4.1) |
| Gastroenterology                             | 233 / 414     | 17.3%             | 326 / 414     | 8.0%              | 233 / 326     | 16.4%             |
|                                              | (56.3%)       | 0.1% (-5.2,5.3)   | (78.7%)       | -1.7% (-6.1,2.7)  | (71.5%)       | -3.0% (-9.5,3.4)  |
| Hematology/Oncology                          | 596 / 1,363   | 4.7%              | 970 / 1,363   | 0.5%              | 596 / 970     | 6.3%              |
|                                              | (43.7%)       | -2.1% (-6.4,2.2)  | (71.2%)       | -4.5% (-8,-1.1)   | (61.4%)       | -4.6% (-9.9,0.7)  |
| Infectious Disease                           | 292 / 575     | 11.8%             | 435 / 575     | 5.0%              | 292 / 435     | 12.0%             |
|                                              | (50.8%)       | 1.0% (-3.8,5.8)   | (75.7%)       | -3.8% (-7.7,0.2)  | (67.1%)       | -1.4% (-7.4,4.5)  |
| Internal Medicine                            | 441 / 931     | 8.4%              | 707 / 931     | 5.2%              | 441 / 707     | 7.3%              |
|                                              | (47.4%)       | -1.3% (-5.8,3.2)  | (75.9%)       | -1.9% (-5.4,1.7)  | (62.4%)       | -3.5% (-9,2.1)    |
| Neurology                                    | 487 / 903     | 14.9%             | 715 / 903     | 8.5%              | 487 / 715     | 13.0%             |
|                                              | (53.9%)       | 3.7% (-0.8,8.2)   | (79.2%)       | 0.7% (-2.8,4.3)   | (68.1%)       | 1.0% (-4.4,6.5)   |
| Obstetrics and Gynecology                    | 191 / 407     | 7.9%              | 310 / 407     | 5.5%              | 191 / 310     | 6.5%              |
|                                              | (46.9%)       | 4.8% (-0.2,9.9)   | (76.2%)       | 1.0% (-3.4,9)     | (61.6%)       | 2.9% (-3.2,9)     |
| Orthopedic Surgery                           | 90 / 173      | 13.0%             | 141 / 173     | 10.8%             | 90 / 141      | 8.7%              |
|                                              | (52.0%)       | 4.1% (-2.5,10.7)  | (81.5%)       | 5.8% (0.7,10.8)   | (63.8%)       | 1.2% (-6.8,9.1)   |
| Other                                        | 1,307 / 2,453 | 14.3%             | 1,921 / 2,453 | 7.6%              | 1,307 / 1,921 | 12.9%             |
|                                              | (53.3%)       | 1.8% (-2.3,5.9)   | (78.3%)       | -0.8% (-4.1,2.4)  | (68.0%)       | -0.4% (-5.4,4.6)  |
| Pathology                                    | 260 / 401     | 25.8%             | 351 / 401     | 16.8%             | 260 / 351     | 19.0%             |
|                                              | (64.8%)       | 7.2% (2.1,12.3)   | (87.5%)       | 3.2% (-1.1,7.4)   | (74.1%)       | 5.0% (-1.2,11.1)  |
| Pediatrics                                   | 800 / 1,817   | 5.0%              | 1,332 / 1,817 | 2.6%              | 800 / 1,332   | 5.0%              |
|                                              | (44.0%)       | -0.2% (-)         | (73.3%)       | -1.4% (-)         | (60.1%)       | -2.9% (-)         |

© 2015 American Medical Association. All rights reserved.

|                                                                    |               |                      |               |                       |               |                       |
|--------------------------------------------------------------------|---------------|----------------------|---------------|-----------------------|---------------|-----------------------|
|                                                                    |               | 4.3,4)               |               | 4.7,1.9)              |               | 8.1,2.2)              |
| Psychiatry                                                         | 390 / 713     | 15.7%                | 570 / 713     | 9.2%                  | 390 / 570     | 13.3%                 |
|                                                                    | (54.7%)       | -0.2% (-<br>4.9,4.5) | (79.9%)       | -0.6% (-<br>4.4,3.2)  | (68.4%)       | -3.0% (-<br>8.8,2.7)  |
| Radiology                                                          | 152 / 282     | 14.9%                | 218 / 282     | 6.6%                  | 152 / 218     | 14.6%                 |
|                                                                    | (53.9%)       | 6.3%<br>(0.8,11.7)   | (77.3%)       | -0.7% (-<br>5.3,4)    | (69.7%)       | 6.6% (0,13.2)         |
| Surgery, general                                                   | 311 / 580     | 14.6%                | 482 / 580     | 12.4%                 | 311 / 482     | 9.4%                  |
|                                                                    | (53.6%)       | 7.3%<br>(2.6,12)     | (83.1%)       | 3.7% (0,7.5)          | (64.5%)       | 5.1% (-<br>0.6,10.7)  |
| Surgery, subspecialty                                              | 441 / 825     | 14.5%                | 667 / 825     | 10.1%                 | 441 / 667     | 11.0%                 |
|                                                                    | (53.5%)       | 6.0%<br>(1.6,10.5)   | (80.8%)       | 1.4% (-<br>2.2,5)     | (66.1%)       | 3.4% (-<br>2.1,8.8)   |
| <b>Publications, total (ref. increment, 1 pub.)</b>                |               | 0.1%<br>(0.1,0.2)    |               | 0.2%<br>(0.1,0.2)     |               | 0.1% (0.1,0.2)        |
| <b>Publications, first or last author (ref. increment, 1 pub.)</b> |               | 0.2%<br>(0.1,0.2)    |               | 0.1% (0,0.2)          |               | 0.2% (0.1,0.2)        |
| <b>Faculty at top-20 medical school</b>                            |               |                      |               |                       |               |                       |
| No                                                                 | 3,956 / 7,449 | Reference            | 5,903 / 7,449 | Reference             | 3,956 / 5,903 | Reference             |
|                                                                    | (53.1%)       |                      | (79.2%)       |                       | (67.0%)       |                       |
| Yes                                                                | 2,698 / 5,776 | -6.4%                | 4,294 / 5,776 | -4.9%                 | 2,698 / 4,294 | -4.2%                 |
|                                                                    | (46.7%)       | -3.0% (-<br>6,0.1)   | (74.3%)       | -2.9% (-<br>5.5,-0.3) | (62.8%)       | -3.6% (-7.0,-<br>0.2) |

**Notes:** Table addresses lack of information on job track/nature, which may be associated with both faculty rank and sex. For example, women physicians may choose clinical track faculty appointments rather than research tracks, the latter being associated with more rapid promotion. We addressed this issue by focusing on a sub-group of physicians with prior NIH funding who are presumably more likely to be on research tracks. Column (1) reports factors associated with full professorship among faculty of all ranks. Column (2) reports factors associated with associate or full professorship among faculty of all ranks. Column (3) reports factors associated with full professorship among faculty at the associate or full professor rank. The reported association between faculty rank and publication count (or years since residency) reflects the marginal impact of an additional publication (or year post residency) on the probability of a given faculty rank. "Top-20" school refers to whether a physician was on faculty at a medical school ranked among the top 20 U.S. medical schools for research by U.S. News and World Report in 2013.
